# Supplementary material for: Prevalence and Disease Spectrum of Extracoronary Arterial Abnormalities in Spontaneous Coronary Artery Dissection
Source: PubMed Central journal article supplement (PMC8613702; doi:10.1001/jamacardio.2021.4690), 2021-11-24
Supplement: jamacardiol-e214690-s001.pdf [file jamacardiol-e214690-s001.pdf]

## Supplementary Online Content

Persu A, Lopez-Sublet M, Al-Hussaini A, et al. Prevalence and disease spectrum of extracoronary arterial abnormalities in spontaneous coronary artery dissection. *JAMA Cardiol*. Published online November 24, 2021. doi:10.1001/jamacardio.2021.4690

**eTable 1.** Comparison of General and Coronary Characteristics Between SCAD Patients With and Without FM

**eTable 2.** Prevalence and Severity of Arterial Tortuosity in Renal and Iliac Vessels of Patients With Spontaneous Coronary Artery Dissection Versus Controls

**eTable 3.** Prevalence and Characteristics of Fibromuscular Dysplasia and Other Extracoronary Abnormalities Detected by MRA and CTA in Patients Evaluated by Both Imaging Modalities

**eFigure.** Flow Chart of Patients From the UK SCAD Registry Included in the Current Analysis

This supplementary material has been provided by the authors to give readers additional information about their work.

**eTable 1. Comparison of General and Coronary Characteristics Between SCAD Patients With and Without FMD**

|                                                           | <b>Patients without FMD<br/>N = 118</b> | <b>Patients with FMD<br/>N =55</b> | <b>P-value</b> |
|-----------------------------------------------------------|-----------------------------------------|------------------------------------|----------------|
| Women (%)                                                 | 113/118 (95.8)                          | 54/55 (98.2)                       | 0.42           |
| Age at diagnosis (years)                                  | 44.6 ± 7.7                              | 44.5 ± 8.3                         | 0.96           |
| Body mass index (kg/m <sup>2</sup> )                      | 25.6 ± 5.2                              | 28.5 ± 17.0                        | 0.10           |
| Smoking habit                                             |                                         |                                    |                |
| Never/former smokers                                      | 89/118 (75.4)                           | 35/55 (63.6)                       | 0.27           |
| Current smokers                                           | 27/118 (22.9)                           | 19/55 (34.5)                       |                |
| Treated hypertension                                      | 20/118 (16.9)                           | 11/55 (20.0)                       | 0.63           |
| Type 2 diabetes                                           | 0/118 (0)                               | 0/55 (0)                           | -              |
| Treated dyslipidaemia                                     | 11/118 (9.3)                            | 3/55 (5.5)                         | 0.39           |
| Type of Acute Coronary Syndromes at presentation of SCAD: |                                         |                                    |                |
| NSTEMI                                                    | 76/118 (64.4)                           | 29/55 (52.7)                       | 0.31           |
| STEMI                                                     | 34/118 (28.8)                           | 20/55 (36.4)                       |                |
| Cardiac arrest                                            | 8/118 (6.8)                             | 6/55 (10.9)                        |                |
| Percutaneous Coronary Intervention                        | 39/118 (33.0)                           | 20/51 (39.2)                       | 0.44           |
| Bailout Coronary Artery Bypass Graft                      | 2/118 (1.7)                             | 3/55 (5.5)                         | 0.16           |
| Angiographic features:                                    |                                         |                                    |                |
| 1. Coronary artery involved (%):                          |                                         |                                    |                |
| LM                                                        | 8/118 (6.8)                             | 4/55 (7.3)                         | 0.91           |
| LAD                                                       | 89/118 (75.4)                           | 33/55 (60.0)                       | 0.04           |
| LCX                                                       | 34/118 (28.8)                           | 21/55 (38.2)                       | 0.22           |
| RCA                                                       | 15/118 (12.7)                           | 14/55 (25.5)                       | 0.04           |
| 2. Portion of the artery involved (%):                    |                                         |                                    |                |
| Proximal involvement                                      | 27/118 (24.2)                           | 9/55 (14.3)                        | 0.33           |
| Mid involvement                                           | 53/118 (44.9)                           | 25/55 (45.5)                       | 0.95           |
| Distal involvement                                        | 64/118 (54.2)                           | 24/55 (43.6)                       | 0.32           |
| Branch involvement                                        | 36/118 (30.5)                           | 18/55 (32.7)                       | 0.77           |
| 3. Multivessel (%)                                        | 18/118 (15.3)                           | 9/55 (16.4)                        | 0.85           |
| 4. Multisegment (%)                                       | 44/118 (37.3)                           | 20/55 (36.4)                       | 0.91           |
| 5. Saw Class (%)                                          |                                         |                                    |                |
| 1                                                         | 17/118 (14.4)                           | 6/55 (10.9)                        | 0.96           |
| 2a                                                        | 53/118 (44.9)                           | 26/55 (47.3)                       |                |
| 2b                                                        | 22/118 (18.6)                           | 10/55 (18.2)                       |                |
| 3                                                         | 9/118 (7.6)                             | 6/55 (10.9)                        |                |
| 4                                                         | 17/118 (14.4)                           | 6/55 (10.9)                        |                |
| Recurrence (%)                                            | 9/118 (7.6)                             | 7/55 (12.7)                        | 0.45           |
| Beighton score                                            |                                         |                                    |                |
| <4                                                        | 82/118 (69.5)                           | 38/55 (69.1)                       | 0.96           |
| ≥4                                                        | 36/118 (30.5)                           | 17/55 (30.9)                       |                |
| Migraines                                                 | 59/118 (50.0)                           | 24/55 (43.6)                       | 0.56           |
| <i>PHACTRI</i>                                            |                                         |                                    |                |
| AA                                                        | 53/114 (46.5)                           | 20/49 (40.8)                       | 0.50           |
| AG                                                        | 55/114 48.2)                            | 23/49 (46.9)                       | 0.88           |

|                      |               |              |      |
|----------------------|---------------|--------------|------|
| GG                   | 6/114 (5.3)   | 6/49 (12.2)  | 0.12 |
| Aneurysms            | 8/118 (6.8)   | 5/55 (9.1)   | 0.59 |
| Arterial dissections | 2/118 (1.7)   | 1/55 (1.8)   | 0.95 |
| Tortuosity*          | 79/118 (66.9) | 42/55 (76.4) | 0.21 |

\*defined as one or more curves  $\geq 45^\circ$

SCAD: Spontaneous Coronary Artery Dissection; FMD: fibromuscular dysplasia.

**eTable 2. Prevalence and Severity of Arterial Tortuosity in Renal and Iliac Vessels of Patients With Spontaneous Coronary Artery Dissection Versus Controls**

| <b>Tortuosity evaluation</b>           | <b>Patients with SCAD<br/>N= 173</b> | <b>Controls<br/>N=41</b> | <b>P-value</b> |
|----------------------------------------|--------------------------------------|--------------------------|----------------|
| <i>Renal arteries</i>                  |                                      |                          |                |
| Right Renal artery                     |                                      |                          |                |
| Straight (%)                           |                                      | 36/41 (87.8)             | 0.49           |
| Tortuosity Index                       | 158/173 (91.3)                       | 21.0 (1/41)              | 0.69           |
| Number of curves $\geq 45^\circ$       | 14.0 $\pm$ 5.7                       | 1.0 (1/41)               | 0.78           |
| Mean angle                             | 6.9 $\pm$ 21.4                       | 62.0 (1/41)              | 0.45           |
|                                        | 54.9 $\pm$ 8.7                       |                          |                |
| Left Renal artery                      |                                      |                          |                |
| Straight (%)                           | 161/173 (93.1)                       | 40/41 (97.6)             | 0.28           |
| Tortuosity Index                       | 29.1 $\pm$ 9.3                       | 25.0 (1/41)              | 0.71           |
| Number of curves $\geq 45^\circ$       | 1 (1/173)                            | -                        | -              |
| Mean angle                             | 70.1 $\pm$ 13.6                      | -                        | -              |
| <i>Iliac arteries</i>                  |                                      |                          |                |
| Right Common Iliac artery              |                                      |                          |                |
| Straight (%)                           | 163/173 (94.2)                       | 41/41 (100)              | 0.12-          |
| Tortuosity Index                       | 17.0 $\pm$ 7.4                       | -                        | -              |
| Number of curves $\geq 45^\circ$       | 1 (1/173)                            | -                        | -              |
| Mean angle                             | 56.8 $\pm$ 12.6                      | -                        | -              |
| Right External Iliac artery            |                                      |                          |                |
| Straight (%)                           | 170/173 (98.3)                       | 41/41 (100)              | 0.49           |
| Tortuosity Index                       | 16.3 $\pm$ 17.2                      | -                        | -              |
| Number of curves $\geq 45^\circ$       | 1.5 $\pm$ 0.7                        | -                        | -              |
| Mean angle                             | 68.5 $\pm$ 29.0                      | -                        | -              |
| Left Common Iliac artery               |                                      |                          |                |
| Straight (%)                           | 155/173 (89.6)                       | 38/41 (92.7)             | 0.55           |
| Tortuosity Index                       | 16.1 $\pm$ 9.5                       | 19.7 $\pm$ 8.6           | 0.55           |
| Number of curves $\geq 45^\circ$       | 1.1 $\pm$ 0.3                        | 1 $\pm$ 0                | 0.71           |
| Mean angle                             | 61.2 $\pm$ 14.7                      | 68.5 $\pm$ 24.8          | 0.56           |
| Left External Iliac artery             |                                      |                          |                |
| One or more curves $\geq 45^\circ$ (%) | 171/173 (98.8)                       | 41/41 (100)              | 0.40           |
| Tortuosity Index                       | 26.8 $\pm$ 34.0                      | -                        | -              |
| Number of curves $\geq 45^\circ$       | 2 (1/173)                            | -                        | -              |
| Mean angle                             | 67.5 (1/173)                         | -                        | -              |

**eTable 3. Prevalence and Characteristics of Fibromuscular Dysplasia and Other Extracoronary Abnormalities Detected by MRA and CTA in Patients Evaluated by Both Imaging Modalities**

| FMD characteristics                            | MRA<br>N=43  | CTA<br>N=43  | <i>P</i> -value |
|------------------------------------------------|--------------|--------------|-----------------|
| Prevalence of multifocal FMD (%)               |              |              |                 |
| At least one arterial bed                      | 15/43 (34.9) | 15/43 (34.9) | 1.00            |
| At least two arterial beds                     | 7/43 (16.3)  | 7/43 (16.3)  | 1.00            |
| Three or more arterial beds                    | 1/43 (2.3)   | 1/43 (2.3)   | 1.00            |
|                                                |              |              |                 |
| Prevalence of FMD lesions in each vascular bed | 6/43 (14.0)  | 8/43 (18.6)  | 0.56            |
| Cervical                                       | 10/43 (23.3) | 7/43 (16.3)  | 0.42            |
| Renal                                          | 0/43 (0)     | 0/43 (0)     | -               |
| Aorta                                          | 2/43 (4.7)   | 3/43 (7.0)   | 0.65            |
| Visceral                                       | 5/43 (11.6)  | 5/43 (11.6)  | 1.00            |
| Iliac                                          | 0/43 (0)     | 1/43 (2.3)   | 0.31            |
| Intracranial                                   |              |              |                 |
|                                                |              |              |                 |
| Aneurysm (%)                                   | 7/43 (16.3)  | 7/43 (16.3)  | 1.00            |
| Intracranial aneurysm (%)                      | 2/43 (4.7)   | 2/43 (4.7)   | 1.00            |
| Arterial dissection                            | 1/43 (2.3)   | 1/43 (2.3)   | 1.00            |

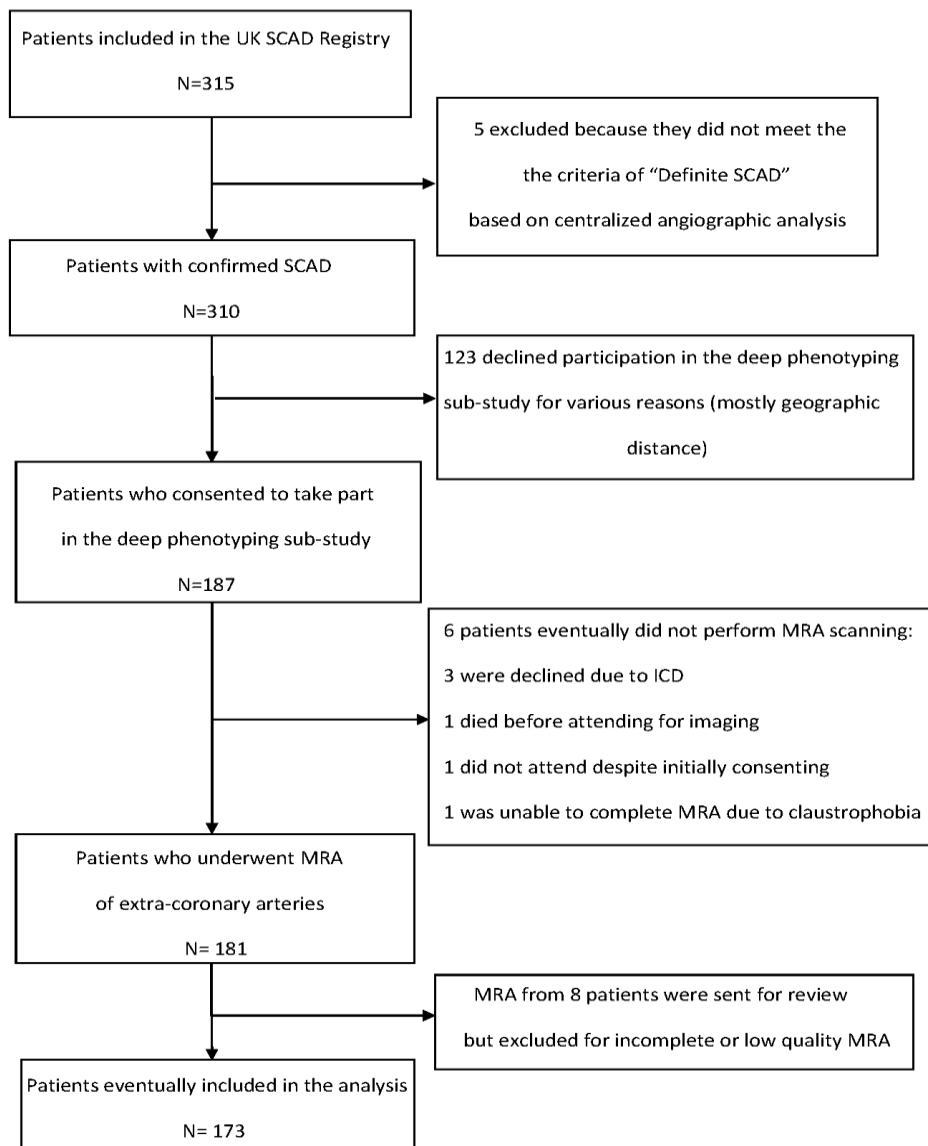

**Figure S1: Flow-chart of patients from the UK SCAD Registry included in the current analysis.**

**eFigure. Flow Chart of Patients From the UK SCAD Registry Included in the Current Analysis**
